# Supplementary material for: Synthesis and properties of azamonocyclic energetic materials with geminal explosophores
Source: Royal Society of Chemistry journal article supplement (doi:10.1039/d1dt00581b), 2021-01-01
Supplement: d1dt00581b1.pdf [file d1dt00581b1.pdf]

# Supporting information

## The Synthesis and Properties of Azamonocyclic Energetic Materials with Geminal Explosophores

Kaidi Yang<sup>a,b</sup>, Fuqiang Bi<sup>a,b</sup>, Qi Xue<sup>a</sup>, Huan Huo<sup>a</sup>, Chao Bai<sup>c</sup>, Junlin Zhang<sup>a,b,\*</sup>, Bozhou Wang<sup>a,b,\*</sup>

<sup>a</sup> Xi'an Modern Chemistry Research Institute, Xi'an 710065, China

<sup>b</sup> State Key Laboratory of Fluorine & Nitrogen Chemicals, Xi'an 710065, China

<sup>c</sup> College of Chemistry & Materials Science, Northwest University, Xi'an 710127, China.

### Computer Method

The reaction mechanism of C-Br cleavage calculations were carried out using Gaussian 16 package. The geometry optimizations were performed at the B3LYP/6-31G(d,p) level and frequency analyses were conducted at the same level of theory to obtain the thermal correction and confirm the stationary points to be minima or transition states. The single-point energy calculations were performed at the M062X/6-311+G(d,p) level. The Grimme's empirical dispersion-correction (Grimme-D3) was applied and the SMD solvation model (considering methanol as the solvent) was introduced in all the calculations.

### Crystallographic data

#### The apparatus and conditions of crystal structure determination

A single crystal of TNHP suitable for X-ray diffraction analysis was prepared by slow evaporation of acetone-H<sub>2</sub>O solvent at room temperature. A colorless crystal with dimension of 0.30×0.30×0.20 mm was selected for X-ray single crystal diffraction analysis. The diffraction data were collected on a BRUKER SMART Apex II CCD X-ray diffractometer equipped with a Mo K $\alpha$  radiation ( $\lambda=0.71073$  Å) using an  $\omega$ - $\theta$  scan mode at 296(2) K. A total of 4432 reflections were obtained in the range of  $1.78 \leq \theta \leq 26.37$ , of which 1674 were independent ( $R_{\text{int}}=0.0261$ ) were considered to

be observed and used for the refinement. The structure was solved by direct methods and refined by full-matrix least-squares techniques on  $F^2$  using SHELES-97 and SHELXL-97 programs. A full-matrix least-squares refinement gave the final  $R_1=0.0371$  and  $\omega R_2=0.0972$  ( $\omega=1/[\sigma^2(F_0^2) + (0.0270 P)^2 + 0.0000 P]$ , where  $P=(F_0^2+2Fc^2)/3$ ). The goodness-of-fit on  $F^2$  is 1.036. The largest difference peak and hole were 0.168 and  $-0.178 e/\text{\AA}^3$ .

A single crystal of TNHA suitable for X-ray diffraction analysis was prepared by slow evaporation of ethyl acetate solvent at room temperature. A colorless crystal with dimension of  $0.15 \times 0.14 \times 0.12$  mm was selected for X-ray single crystal diffraction analysis. The diffraction data were collected on a BRUKER SMART Apex II CCD X-ray diffractometer equipped with a Mo  $K\alpha$  radiation ( $\lambda=0.71073$  A) using an  $\omega$ - $\theta$  scan mode at 150(2) K. A total of 5950 reflections were obtained in the range of  $3.242^\circ \leq \theta \leq 26.422^\circ$ , of which 1716 were independent ( $R_{\text{int}}=0.0392$ ) were considered to be observed and used for the refinement. The structure was solved by direct methods and refined by full-matrix least-squares techniques on  $F^2$  using SHELES-97 and SHELXL-97 programs. A full-matrix least-squares refinement gave the final  $R_1=0.0280$  and  $\omega R_2=0.0560$  ( $\omega=1/[\sigma^2(F_0^2) + (0.0270 P)^2 + 0.0000 P]$ , where  $P=(F_0^2+2Fc^2)/3$ ). The goodness-of-fit on  $F^2$  is 1.054. The largest difference peak and hole were 0.145 and  $-0.144 e/\text{\AA}^3$ .

A single crystal of DNNC suitable for X-ray diffraction analysis was prepared by slow evaporation of ethyl acetate solvent at room temperature. A colorless crystal was selected for X-ray single crystal diffraction analysis. The diffraction data were collected on a BRUKER SMART Apex II CCD X-ray diffractometer equipped with a Mo  $K\alpha$  radiation ( $\lambda=1.54178$  A) using an  $\omega$ - $\theta$  scan mode at 150(2) K. A total of 35702 reflections were obtained of which 10000 were independent ( $R_{\text{int}}=0.0450$ ) were considered to be observed and used for the refinement. The structure was solved by direct methods and refined by full-matrix least-squares techniques on  $F^2$  using SHELES-97 programs. A full-matrix least-squares refinement gave the final  $R_1=$

0.0582 and  $\omega R_2 = 0.1503$  ( $I \geq 2(I)$ ), where  $P = (F_0^2 + 2Fc^2)/3$ . The goodness-of-fit on  $F^2$  is 1.057.

**Table S1.** Crystal data and structure refinement parameters for TNHP and TNHA

| Compound                                  | TNHP                                                        | TNHA                                                        | DNNC                                                        |
|-------------------------------------------|-------------------------------------------------------------|-------------------------------------------------------------|-------------------------------------------------------------|
| Empirical formula                         | C <sub>4</sub> H <sub>7</sub> N <sub>5</sub> O <sub>6</sub> | C <sub>4</sub> H <sub>6</sub> N <sub>8</sub> O <sub>6</sub> | C <sub>4</sub> H <sub>6</sub> N <sub>6</sub> O <sub>8</sub> |
| Molar mass (g/mol)                        | 221.15                                                      | 262.17                                                      | 266.15                                                      |
| Temperature (K)                           | 296(2)                                                      | 150(2)                                                      | 150(2)                                                      |
| Crystal system                            | Monoclinic                                                  | Monoclinic                                                  | orthorhombic                                                |
| Space group                               | <i>P2(1)/n</i>                                              | <i>Cc</i>                                                   | <i>P2<sub>1</sub> 2<sub>1</sub> 2<sub>1</sub></i>           |
| <i>a</i> (Å)                              | 12.218(18)                                                  | 13.308                                                      | 11.0204                                                     |
| <i>b</i> (Å)                              | 6.501(9)                                                    | 6.3183                                                      | 15.5390                                                     |
| <i>c</i> (Å)                              | 11.023(17)                                                  | 12.2565                                                     | 33.3517                                                     |
| $\alpha$ (°)                              | 90.00(6)                                                    | 90                                                          | 90                                                          |
| $\beta$ (°)                               | 110.168(2)                                                  | 109.22                                                      | 90                                                          |
| $\gamma$ (°)                              | 90.00                                                       | 90                                                          | 90                                                          |
| <i>V</i> (Å <sup>3</sup> )                | 821.9 (2)                                                   | 973.15                                                      | 5711.34                                                     |
| <i>Z</i>                                  | 4                                                           | 4                                                           | 24                                                          |
| <i>h</i>                                  | -14 ≤ <i>h</i> ≤ 15                                         | -15 ≤ <i>h</i> ≤ 15                                         | -12 ≤ <i>h</i> ≤ 13                                         |
| <i>k</i>                                  | -8 ≤ <i>k</i> ≤ 4                                           | -7 ≤ <i>k</i> ≤ 7                                           | -18 ≤ <i>k</i> ≤ 18                                         |
| <i>l</i>                                  | -13 ≤ <i>l</i> ≤ 11                                         | -14 ≤ <i>l</i> ≤ 14                                         | -39 ≤ <i>l</i> ≤ 39                                         |
| <i>D<sub>c</sub></i> (g/cm <sup>3</sup> ) | 1.787                                                       | 1.789                                                       | 1.857                                                       |
| $\lambda$ (Å)                             | 0.71073                                                     | 0.71073                                                     | 1.54178                                                     |
| <i>F</i> (0 0 0)                          | 456                                                         | 536                                                         | 3264.0                                                      |
| $\theta$ range (°)                        | 1.78-26.37                                                  | 3.242-26.422                                                | 2.650-70.199                                                |

|                                                                             |                |                |                |
|-----------------------------------------------------------------------------|----------------|----------------|----------------|
| Measured reflections                                                        | 4432           | 6793           | 35702          |
| Unique data ( <i>R</i> <sub>int</sub> )                                     | 1674 (0.0261)  | 1980(0.0392)   | 10000 (0.0450) |
| <i>R</i> <sub>1</sub> , <i>wR</i> <sub>2</sub> [ <i>I</i> > 2σ( <i>I</i> )] | 0.0371,0.0872  | 0.0280, 0.0560 | 0.0582, 0.1503 |
| <i>R</i> <sub>1</sub> , <i>wR</i> <sub>2</sub> (all data)                   | 0.0532, 0.0962 | 0.0345, 0.0600 | 0.0628, 0.1553 |
| Goodness-of-fit                                                             | 1.036          | 1.054          | 1.057          |

### X-Ray crystal structure

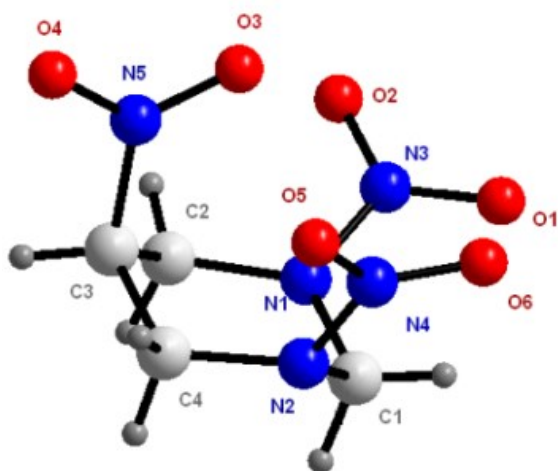

Figure S1. The molecular structure of TNHP

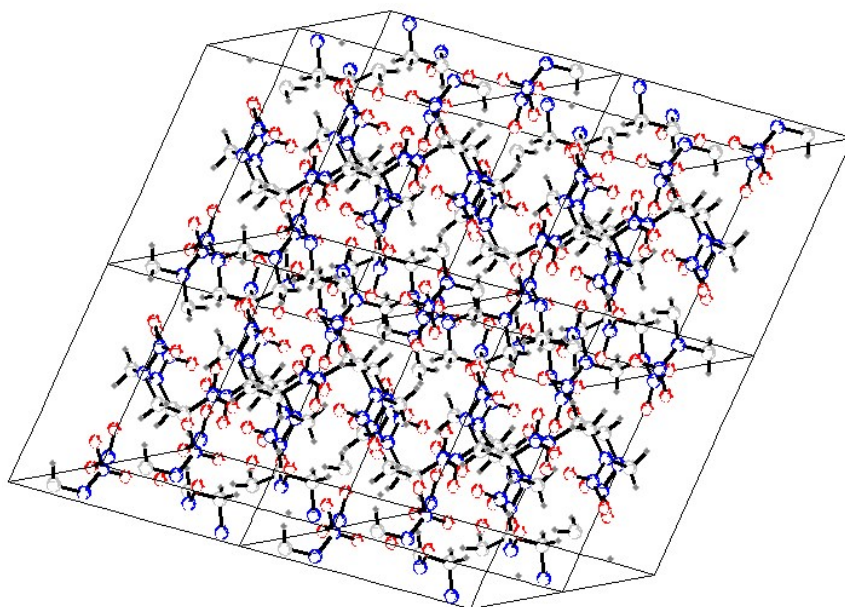

Figure S2. The packing diagram of TNHP

**Bond lengths and angles of TNHA, DNNC and TNHP**

**Table S2. Bond length of TNHA/ Å**

---

|           |          |
|-----------|----------|
| C(1)-N(1) | 1.456(4) |
| C(1)-N(2) | 1.458(4) |
| C(1)-H(1) | 0.9900   |
| C(2)-N(1) | 1.456(4) |
| C(2)-C(3) | 1.542(4) |
| C(2)-H(2) | 0.9900   |
| C(3)-N(5) | 1.443(4) |
| C(3)-C(4) | 1.533(4) |
| C(3)-N(8) | 1.544(4) |
| C(4)-N(2) | 1.454    |
| C(4)-H(4) | 0.9900   |
| N(1)-N(3) | 1.388(4) |
| N(2)-N(4) | 1.377(4) |
| N(3)-O(2) | 1.225(3) |
| N(4)-O(3) | 1.219(3) |
| N(4)-O(4) | 1.227(3) |
| N(5)-N(6) | 1.257(4) |
| N(6)-N(7) | 1.116(4) |
| N(8)-O(6) | 1.211(3) |
| N(8)-O(5) | 1.215(4) |

---

**Table S3. Bond angles of TNHA**

---

|                  |          |
|------------------|----------|
| N(1)-C(1)-N(2)   | 111.3(2) |
| N(1)-C(1)-H(1A)  | 109.4    |
| H(1A)-C(1)-H(1B) | 108.0    |
| N(1)-C(2)-C(3)   | 110.1(2) |
| N(1)-C(2)-H(2A)  | 109.6    |
| H(2A)-C(2)-H(2B) | 108.1    |
| N(5)-C(3)-C(4)   | 107.1(2) |
| N(5)-C(3)-C(2)   | 114.6(2) |
| C(4)-C(3)-C(2)   | 111.4(2) |
| N(5)-C(3)-N(8)   | 110.0(2) |
| C(4)-C(3)-N(8)   | 107.0(2) |
| C(2)-C(3)-N(8)   | 106.5(2) |
| N(2)-C(4)-C(3)   | 108.8(2) |
| N(3)-N(1)-C(1)   | 117.1(2) |
| C(4)-N(2)-C(1)   | 116.2(2) |
| O(2)-N(3)-O(1)   | 125.2(3) |
| O(2)-N(3)-N(1)   | 117.3(3) |
| O(3)-N(4)-O(4)   | 125.0(3) |
| O(3)-N(4)-N(2)   | 117.6(2) |
| N(6)-N(5)-C(3)   | 115.0(3) |
| N(7)-N(6)-N(5)   | 172.1(3) |
| O(6)-N(8)-O(5)   | 124.8(3) |
| O(6)-N(8)-C(3)   | 118.5(3) |
| O(5)-N(8)-C(3)   | 116.7(2) |

---

**Table S4. Bond length of DNNC/ Å**

---

|           |          |
|-----------|----------|
| C(1)-N(1) | 1.459(7) |
| C(1)-N(2) | 1.488(6) |
| C(1)-H(1) | 0.9900   |
| C(2)-N(1) | 1.460(6) |
| C(2)-C(3) | 1.533(7) |
| C(2)-H(2) | 0.9900   |
| C(3)-N(5) | 1.455(6) |
| C(3)-C(4) | 1.534(7) |
| C(3)-N(8) | 1.443(7) |
| C(4)-N(2) | 1.461(6) |
| C(4)-H(4) | 0.9900   |
| N(1)-N(3) | 1.376(6) |
| N(2)-N(4) | 1.363(6) |
| N(3)-O(2) | 1.211(6) |
| N(4)-O(3) | 1.226(6) |
| N(4)-O(4) | 1.216(6) |

---

**Table S5. Bond angles of DNNC**

---

|                  |          |
|------------------|----------|
| N(1)-C(1)-N(2)   | 119.4(4) |
| N(1)-C(1)-H(1A)  | 109.7    |
| H(1A)-C(1)-H(1B) | 108.0    |
| N(1)-C(2)-C(3)   | 106.1(4) |
| N(1)-C(2)-H(2A)  | 109.6    |
| H(2A)-C(2)-H(2B) | 108.1    |
| N(5)-C(3)-C(4)   | 109.0(4) |

---

---

|                |          |
|----------------|----------|
| N(5)-C(3)-C(2) | 110.7(4) |
| C(4)-C(3)-C(2) | 114.3(4) |
| N(5)-C(3)-N(8) | 104.1(4) |
| C(4)-C(3)-N(8) | 111.6(4) |
| C(2)-C(3)-N(8) | 110.1(4) |
| N(2)-C(4)-C(3) | 111.0(2) |
| O(2)-N(3)-N(1) | 116.8(5) |
| O(3)-N(4)-O(4) | 125.5(5) |
| O(3)-N(4)-N(2) | 116.7(5) |
| N(6)-N(5)-C(3) | 110.1(4) |
| N(7)-N(6)-N(5) | 172.1(3) |
| O(6)-N(8)-O(5) | 125.5(6) |
| O(6)-N(8)-C(3) | 117.7(5) |
| O(5)-N(8)-C(3) | 113.7(5) |

---

**Table S6. Bond lengths of TNHP/ Å**

---

|           |          |
|-----------|----------|
| C(1)-N(1) | 1.452(2) |
| C(1)-N(2) | 1.453(2) |
| C(2)-N(1) | 1.454(2) |
| C(2)-C(3) | 1.517(2) |
| C(3)-N(5) | 1.505(2) |
| C(3)-C(4) | 1.521(3) |
| C(4)-N(2) | 1.459(2) |
| N(1)-N(3) | 1.356(2) |
| N(2)-N(4) | 1.400(2) |

---



---

|           |            |
|-----------|------------|
| N(3)-O(2) | 1.2221(19) |
| N(3)-O(1) | 1.2235(19) |
| N(4)-O(6) | 1.208(2)   |
| N(4)-O(5) | 1.214(2)   |
| N(5)-O(4) | 1.2110(19) |
| N(5)-O(3) | 1.2186(19) |

---

**Table S7. Bond angles of TNHP**

---

|                |            |
|----------------|------------|
| N(1)-C(1)-N(2) | 110.98(14) |
| N(1)-C(2)-C(3) | 111.89(14) |
| N(5)-C(3)-C(2) | 111.54(15) |
| N(5)-C(3)-C(4) | 109.05(15) |
| C(2)-C(3)-C(4) | 112.02(15) |
| N(2)-C(4)-C(3) | 112.72(14) |
| N(3)-N(1)-C(1) | 119.89(14) |
| N(3)-N(1)-C(2) | 119.44(15) |
| C(1)-N(1)-C(2) | 118.08(14) |
| N(4)-N(2)-C(1) | 116.04(14) |
| N(4)-N(2)-C(4) | 116.07(14) |
| C(1)-N(2)-C(4) | 114.48(14) |
| O(2)-N(3)-O(1) | 124.13(16) |
| O(2)-N(3)-N(1) | 118.12(15) |
| O(6)-N(4)-N(2) | 117.26(15) |
| O(5)-N(4)-N(2) | 116.82(16) |
| O(4)-N(5)-O(3) | 124.56(17) |

---

## DSC-TG traces of TNBrP and TNHP

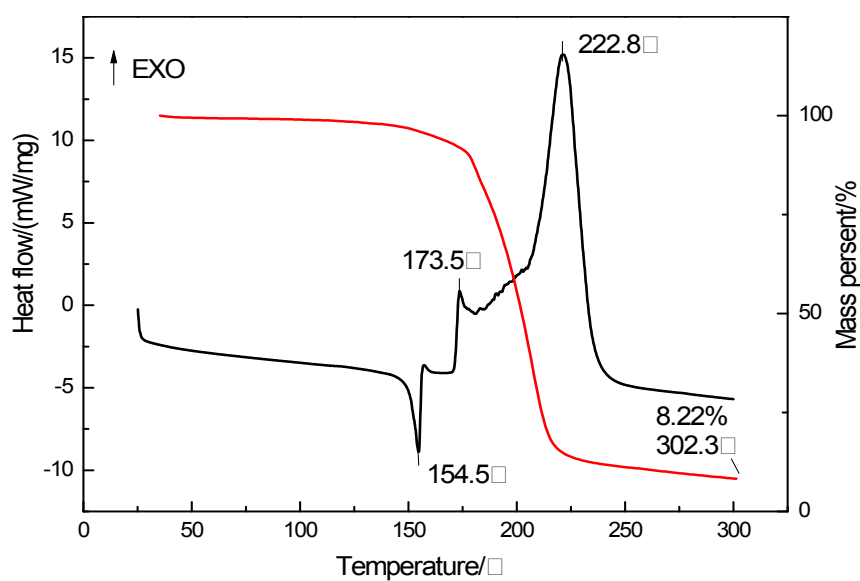

Figure S3. DSC-TG curves of TNBrP

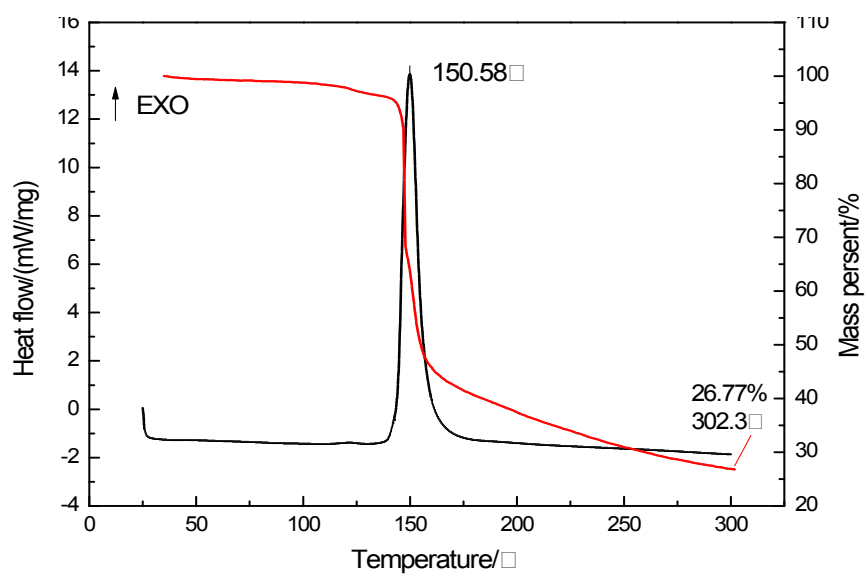

Figure S4. DSC-TG curves of TNHP

## NMR spectra

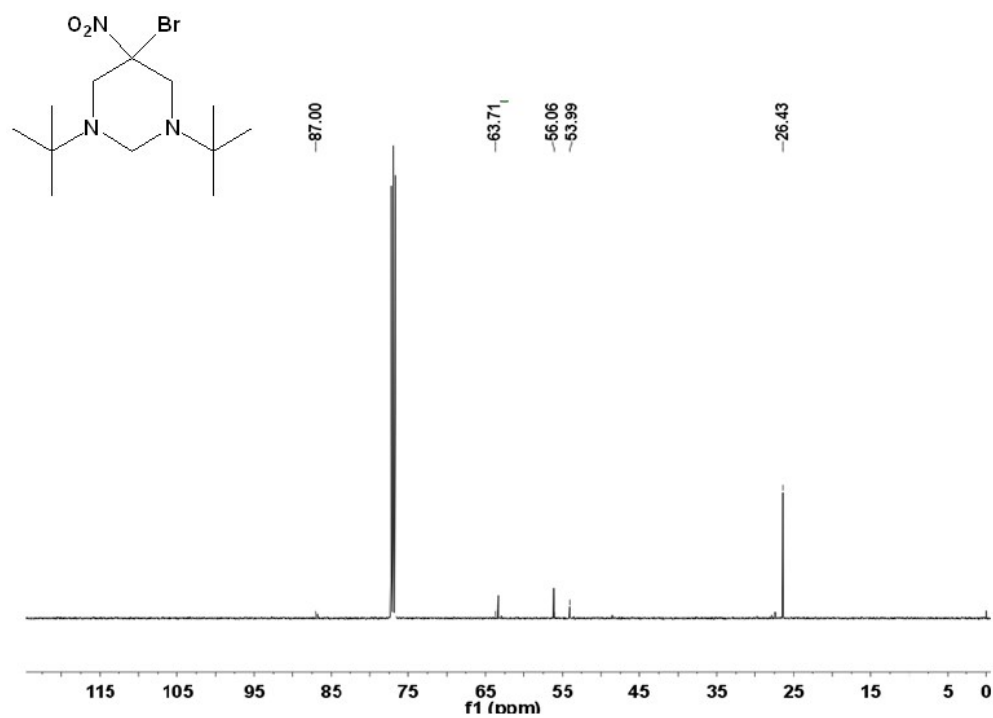

Figure S5.  $^{13}\text{C}$  NMR of DBBrP ( $d\text{-CDCl}_3$ )

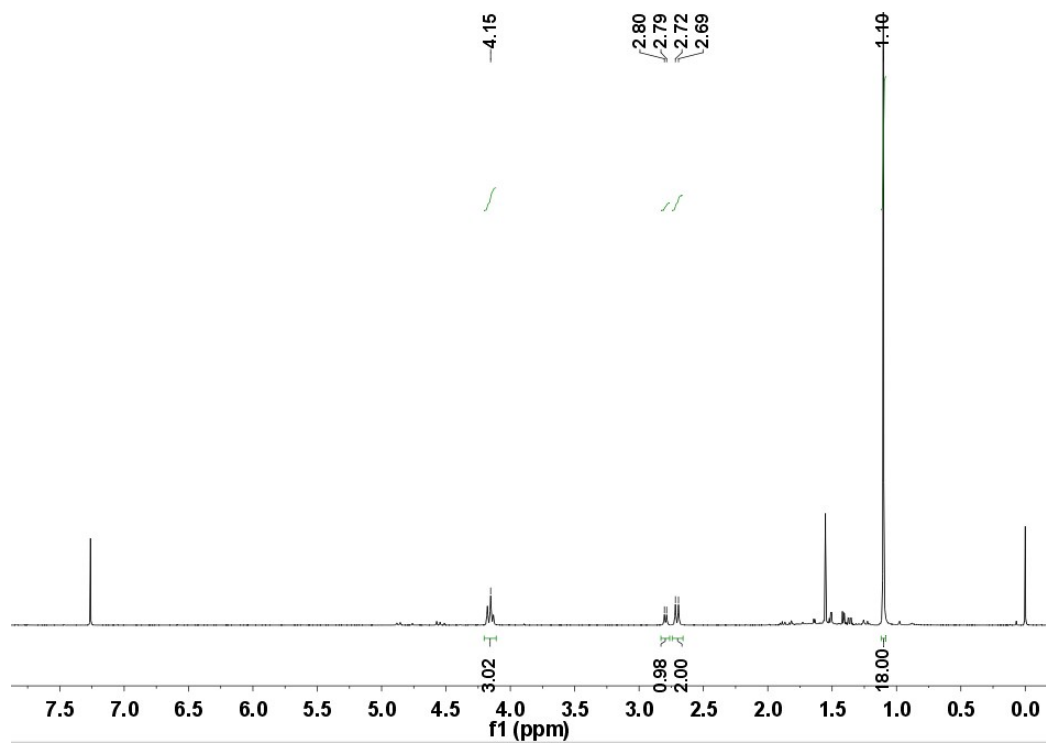

Figure S6.  $^1\text{H}$  NMR of DBBrP ( $d\text{-CDCl}_3$ )

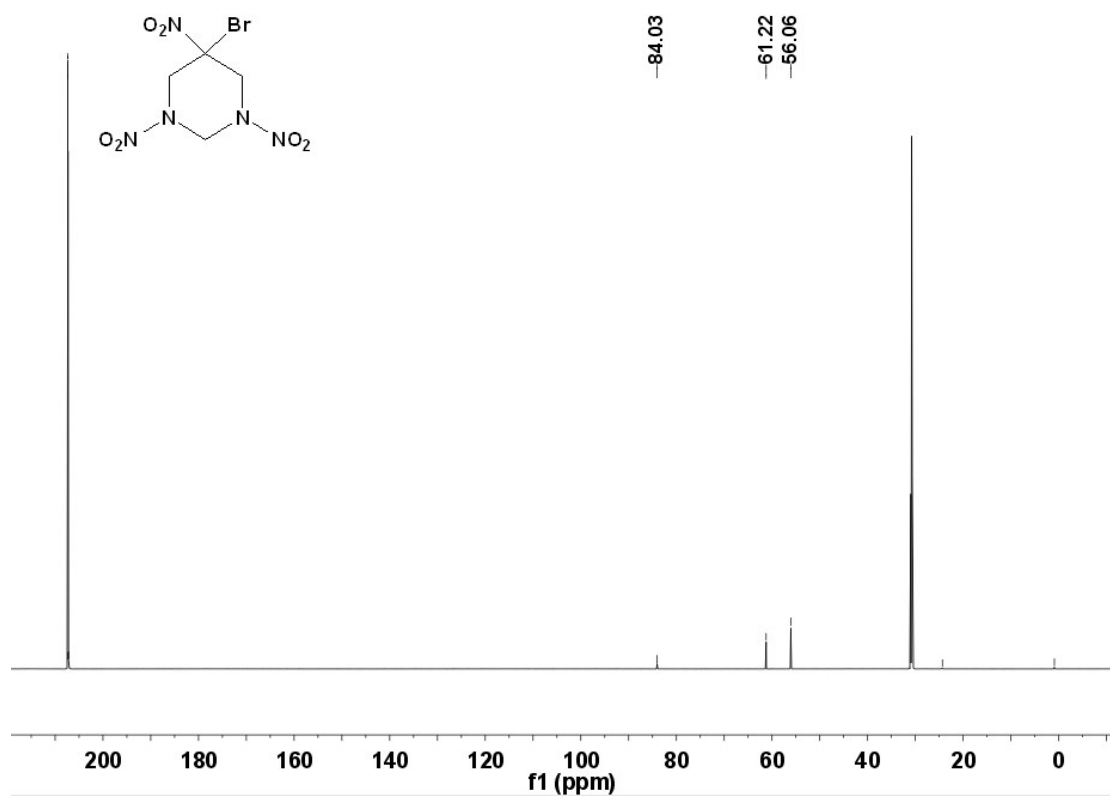

Figure S7.  $^{13}\text{C}$  NMR of TNBrP (*d*-acetone)

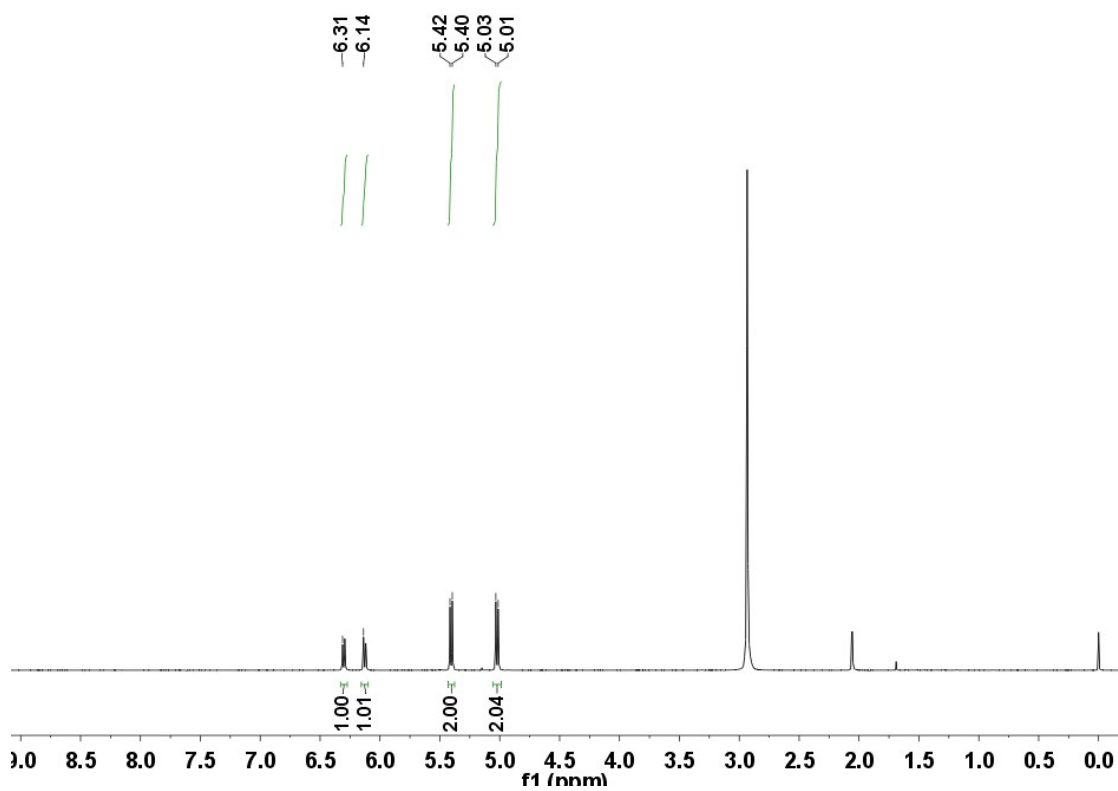

Figure S8.  $^1\text{H}$  NMR of TNBrP (*d*-acetone)

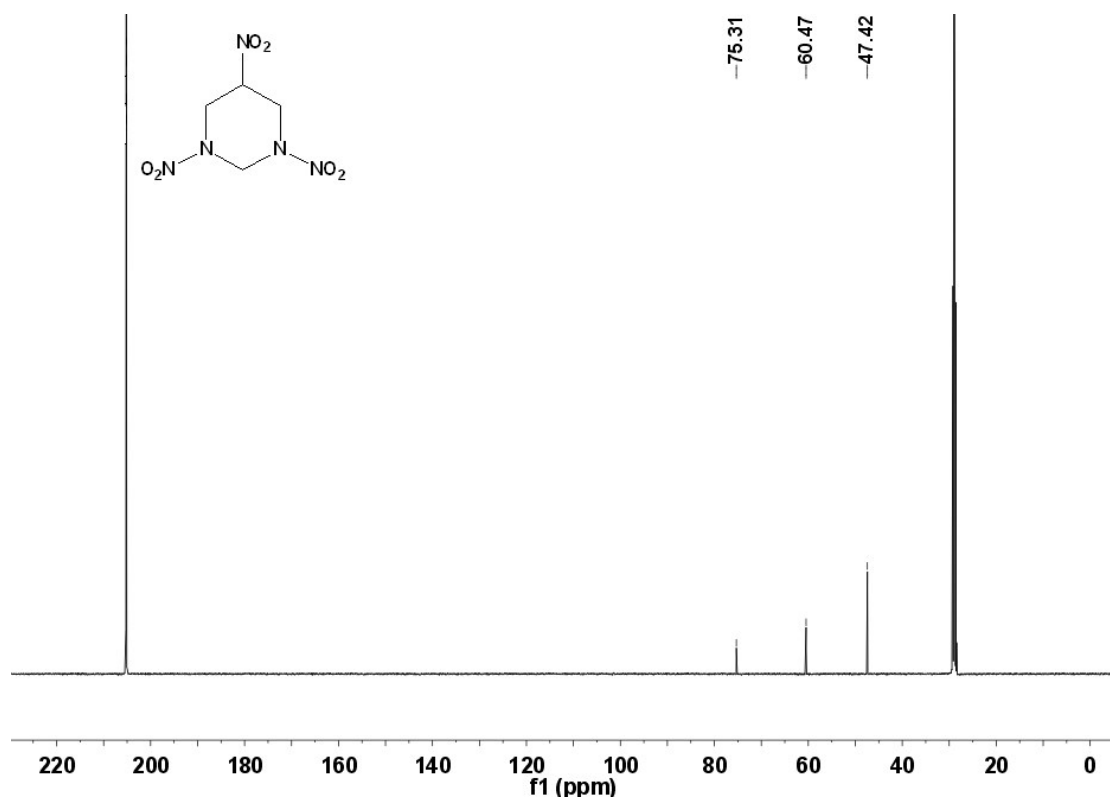

Figure S9.  $^{13}\text{C}$  NMR of TNHP (*d*-acetone)

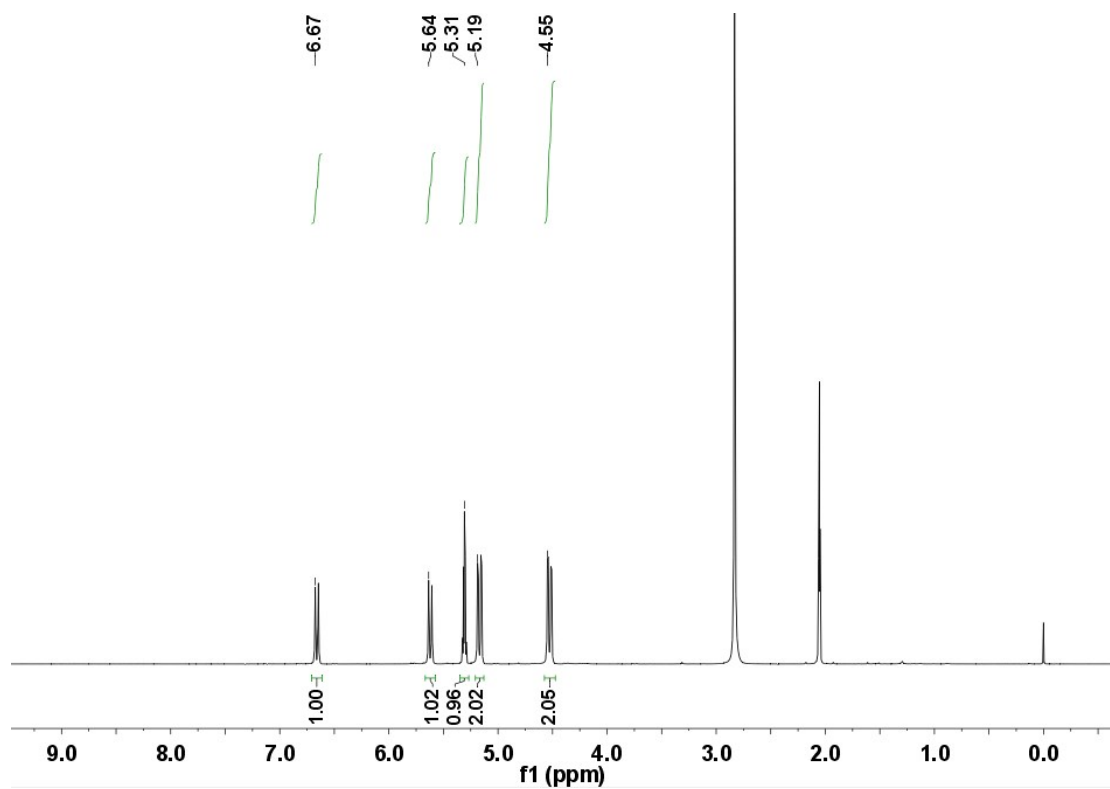

Figure S10.  $^1\text{H}$  NMR of TNHP (*d*-acetone)

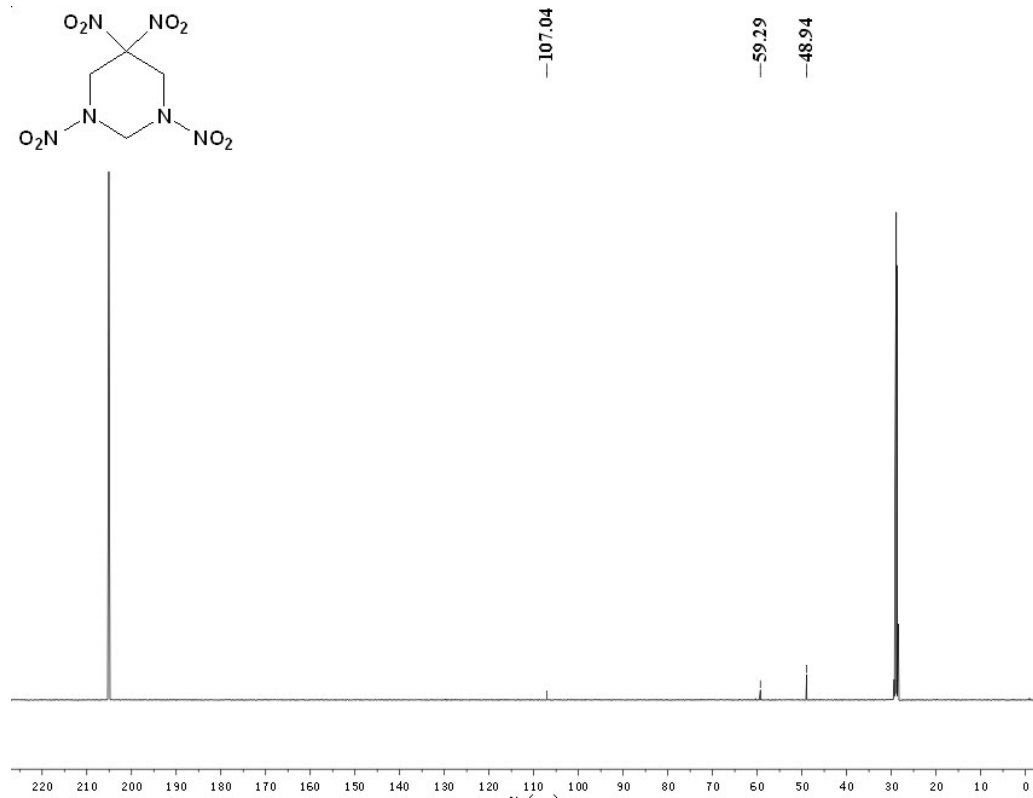

Figure S11. <sup>13</sup>C NMR of DNNC (*d*-acetone)

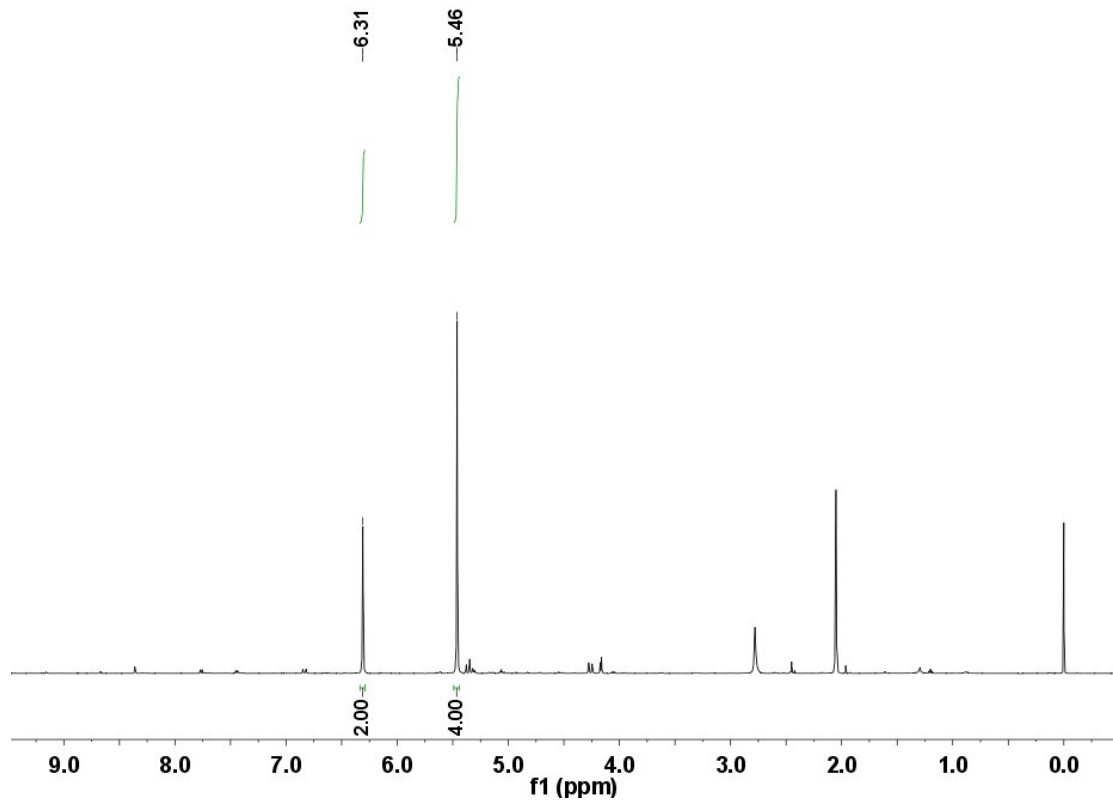

Figure S12. <sup>1</sup>H NMR of DNNC (*d*-acetone)

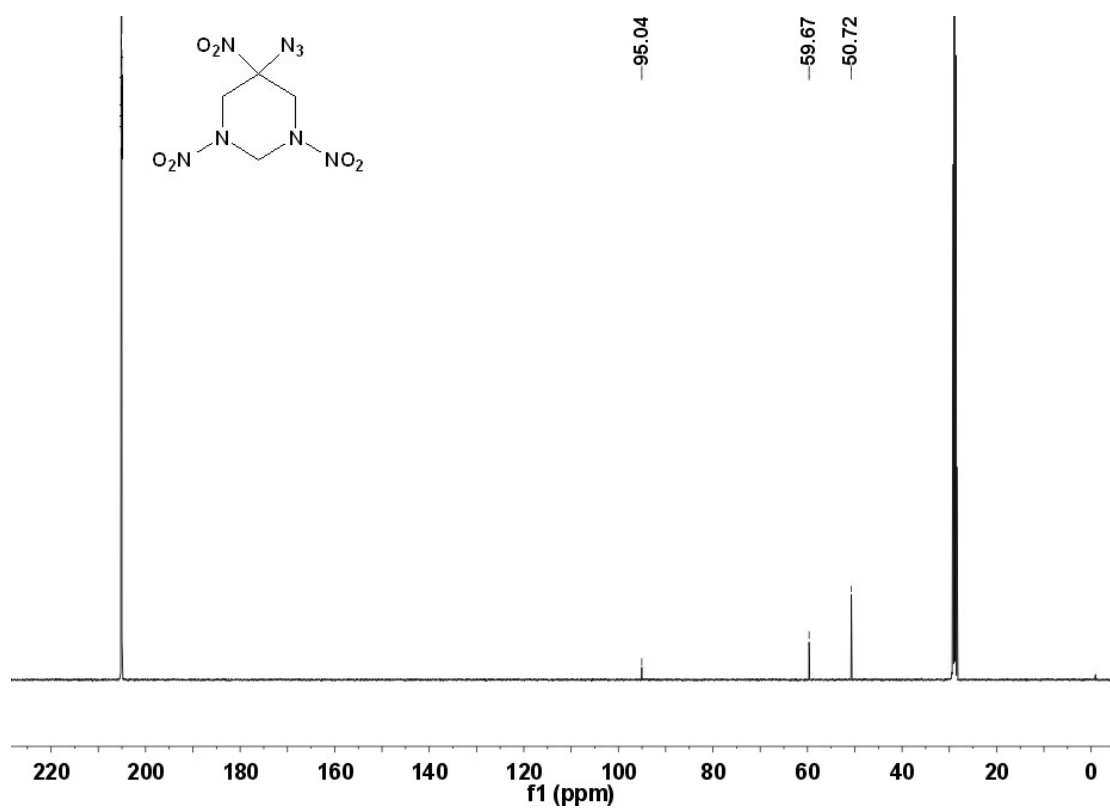

Figure S13. <sup>13</sup>C NMR of TNHA (*d*-acetone)

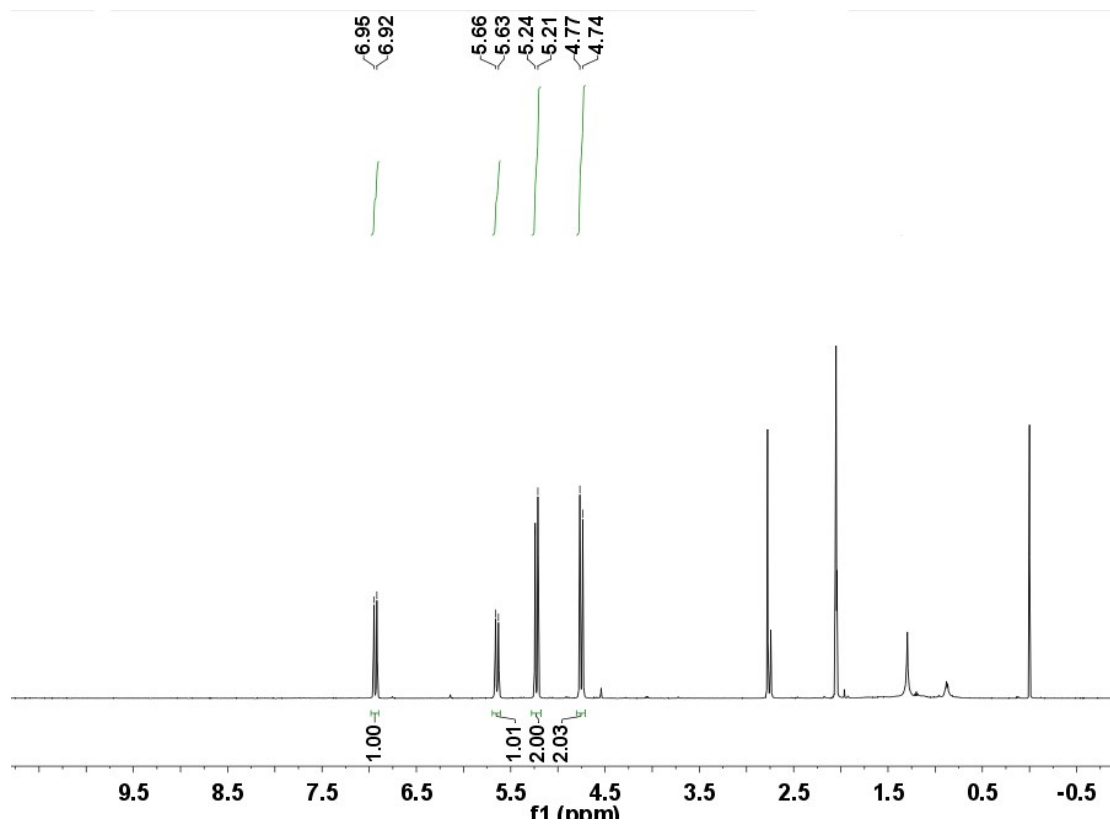

Figure S14.  $^1\text{H}$  NMR of TNHA (*d*-acetone)



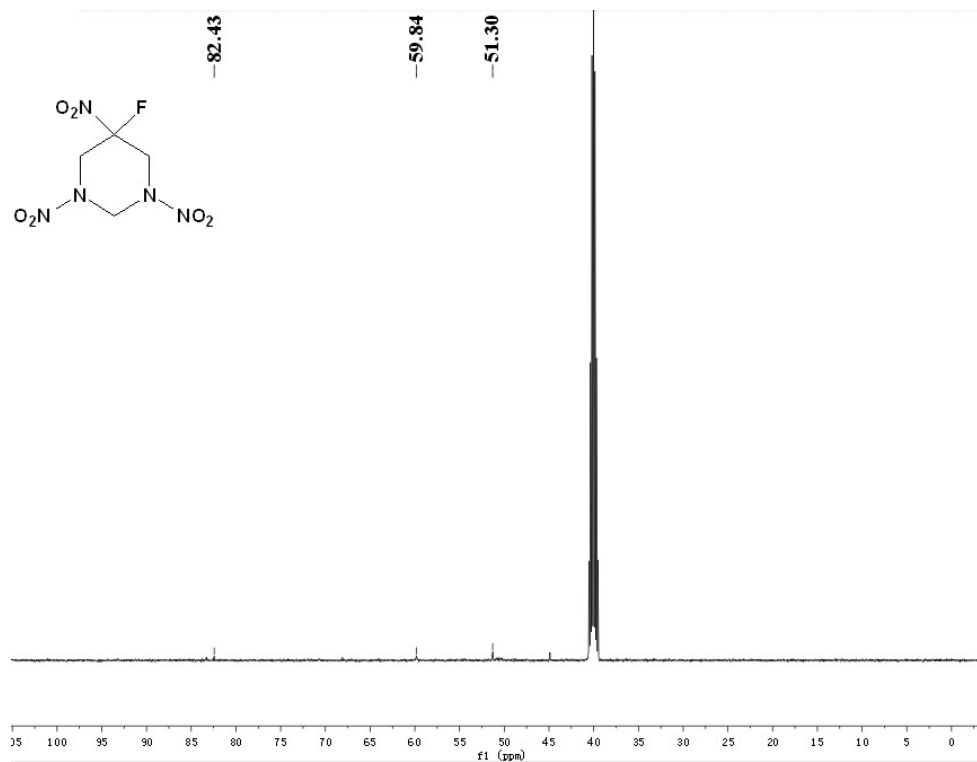

Figure S15.  $^{13}\text{C}$  NMR of TNHF (*d*-DMSO)

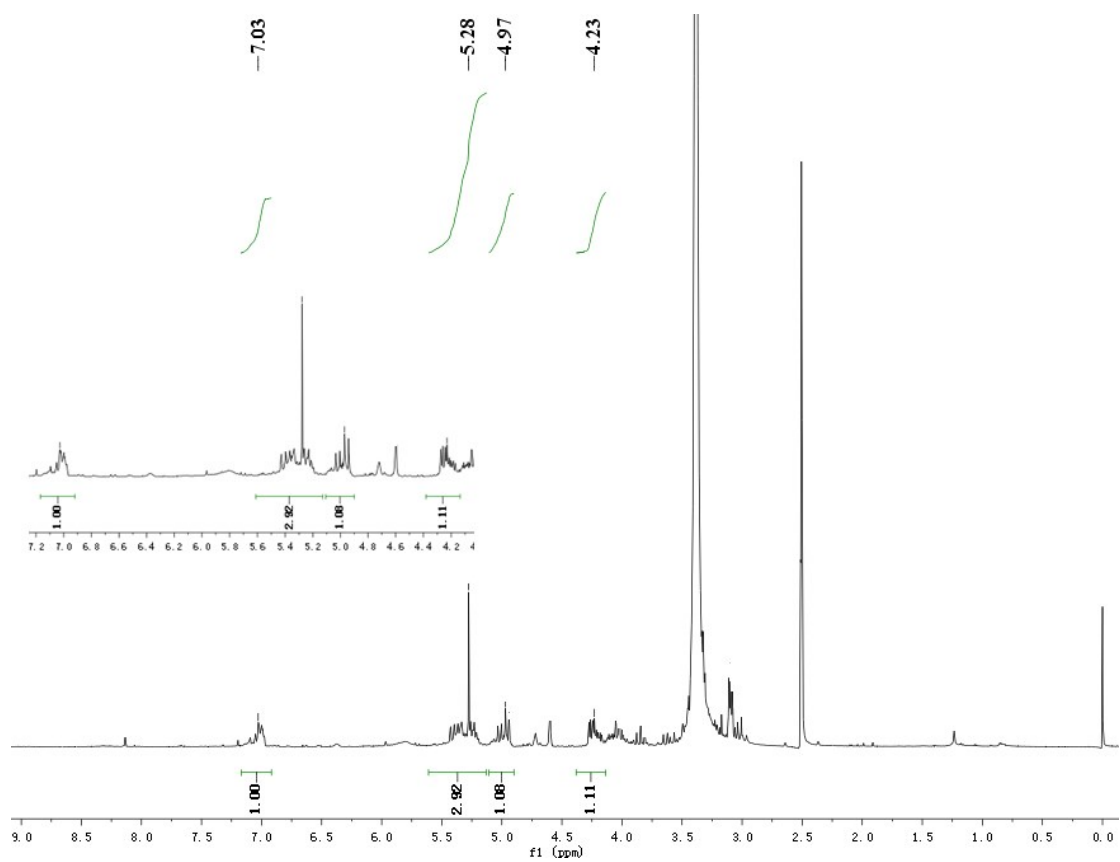

Figure S16.  $^1\text{H}$  NMR of TNHF (*d*-DMSO)

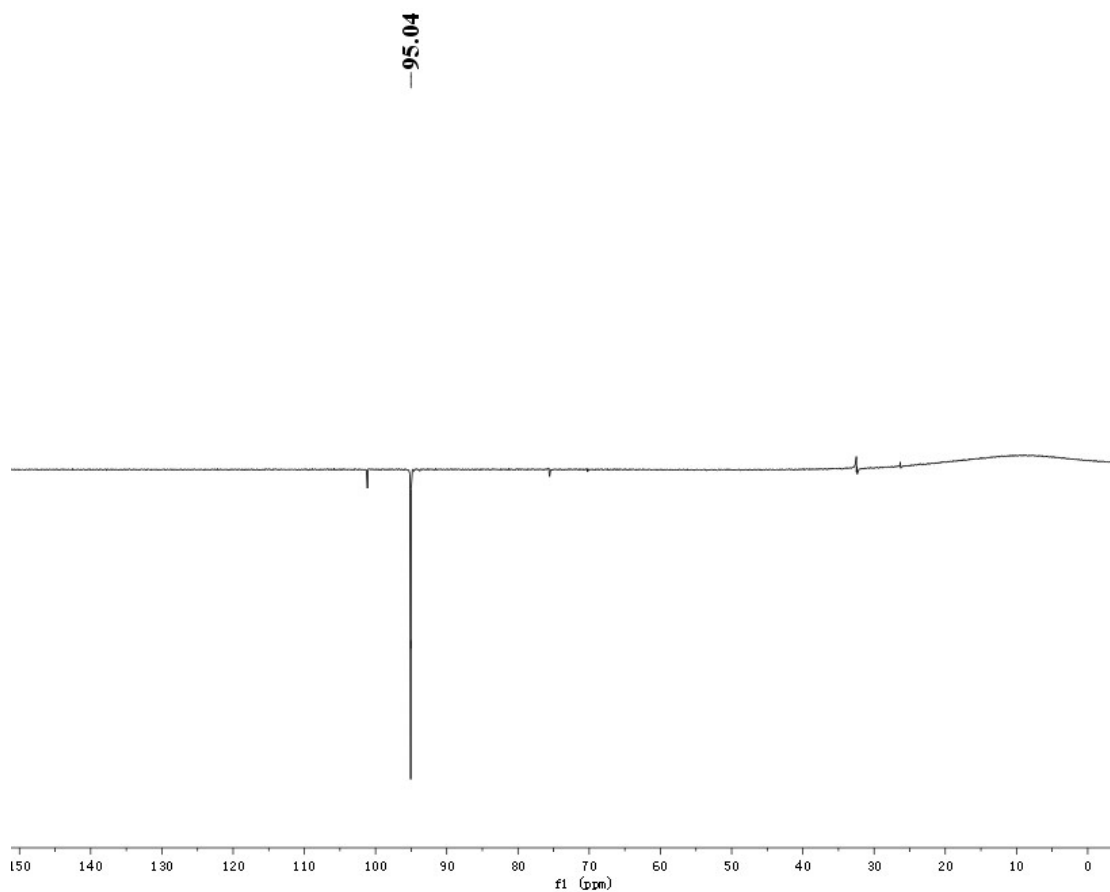

Figure S17.  $^{19}\text{F}$  NMR of TNHF (*d*-DMSO)

## IR Spectra

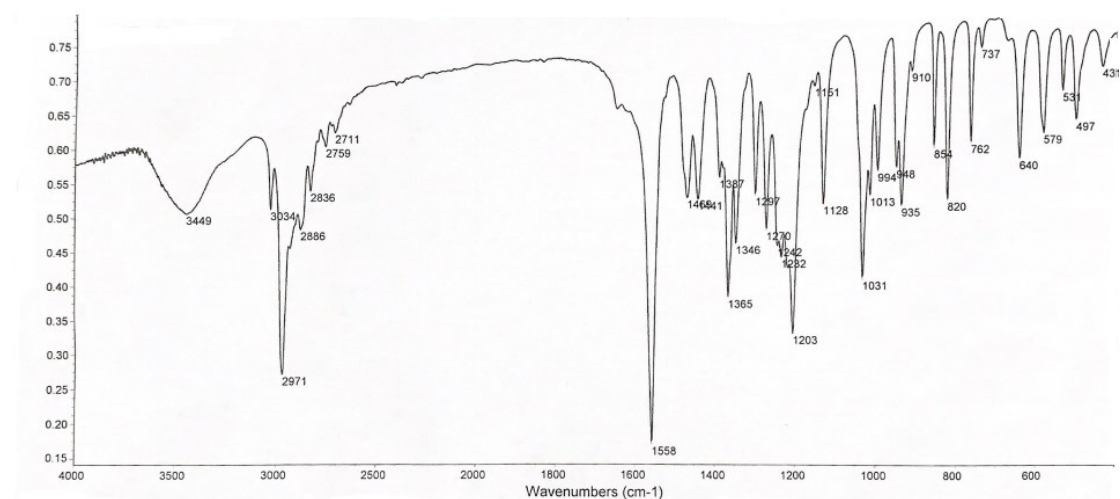

Figure S18. IR spectra of DBBrP

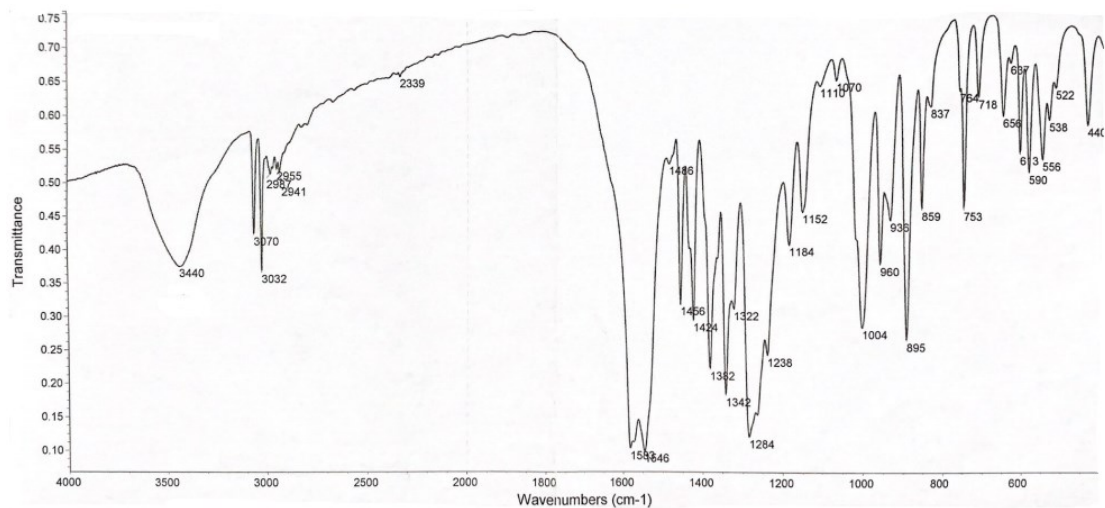

**Figure S19. IR spectra of TNBrP**

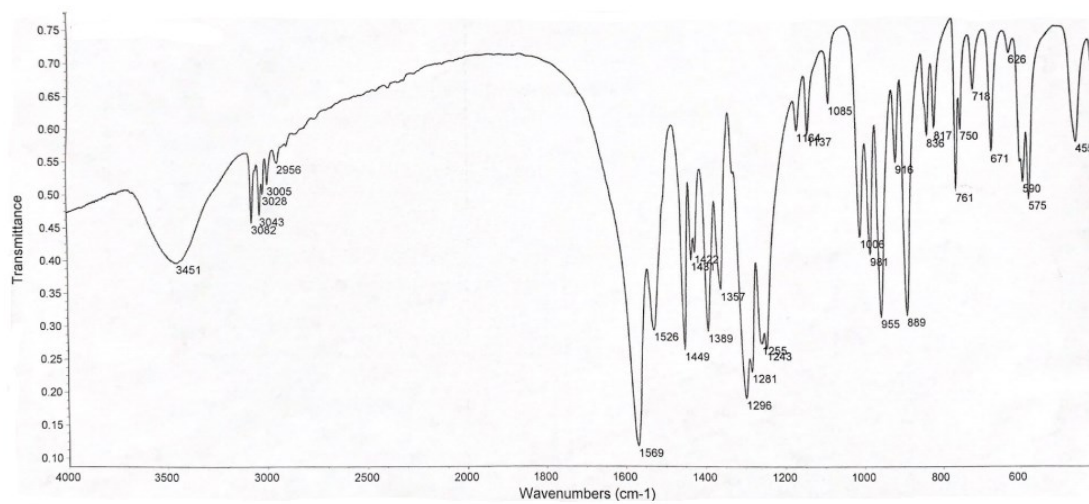

**Figure S20. IR spectra of TNHP**

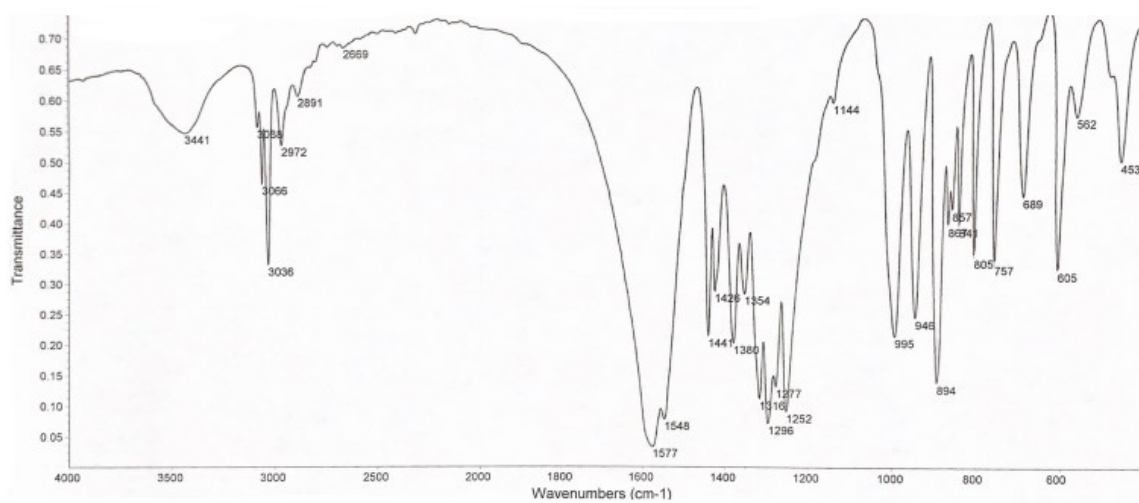

**Figure S21. IR spectra of DNNC**

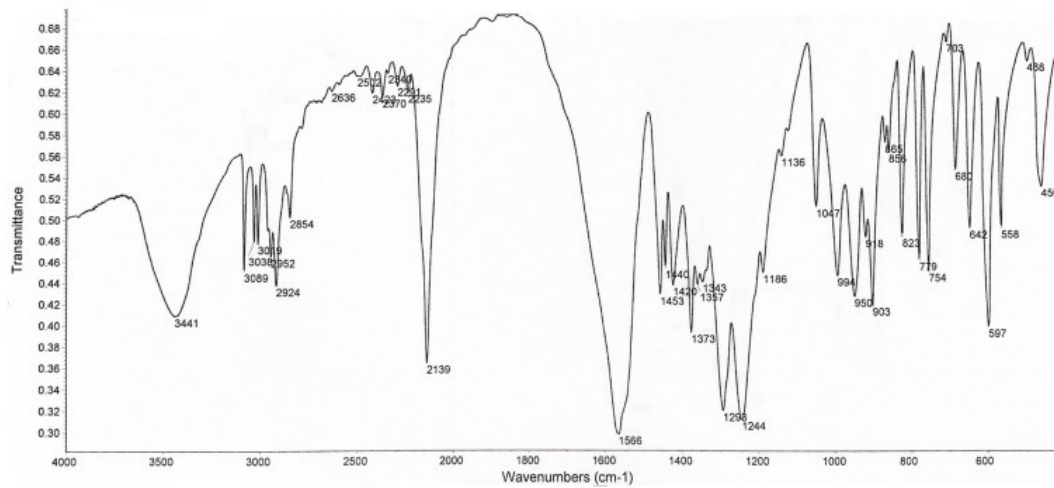

**Figure S22. IR spectra of TNHA**

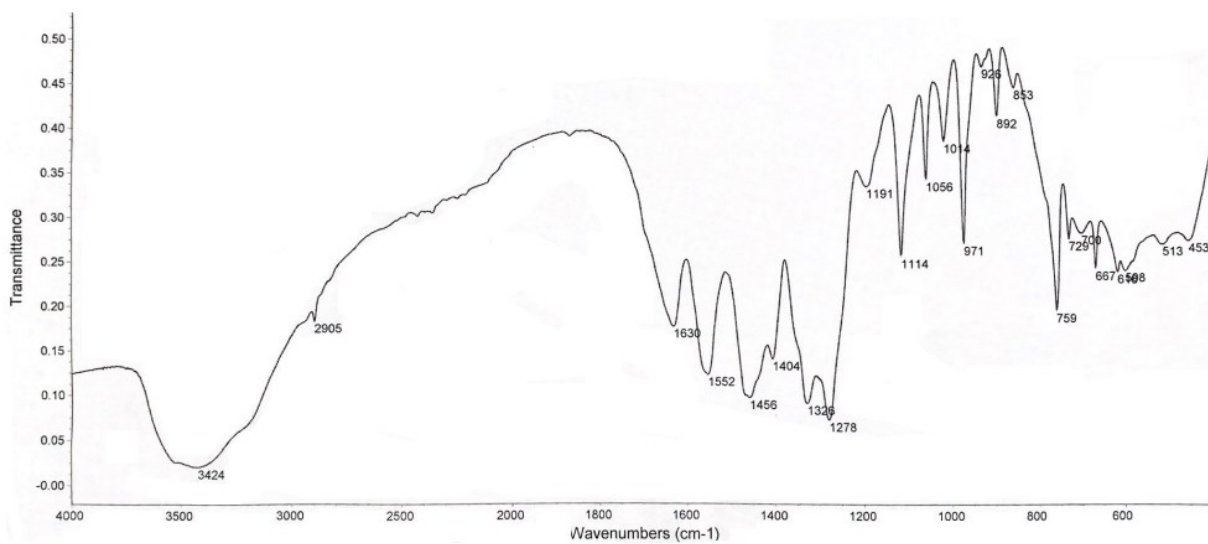

**Figure S23. IR spectra of TNK**

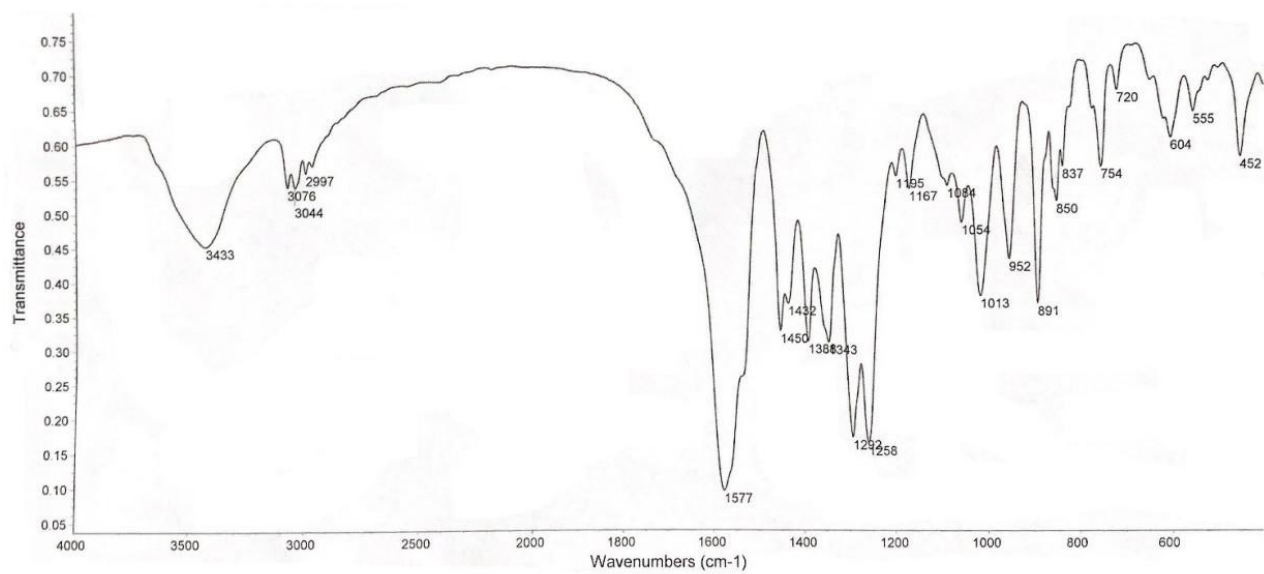

**Figure S24. IR spectra of TNHF**
